# Supplementary material for: Training health workers and community influencers to be Vaccine Champions: a mixed-methods RE-AIM evaluation
Source: HighWire-hosted journal article supplement (doi:10.1136/bmjgh-2024-015433), 2024-09-01
Supplement: bmjgh-2024-015433supp001_data_supplement.pdf [file bmjgh-2024-015433supp001_data_supplement.pdf]

Supplemental material

Supplemental Figure 1. Data collection timeline. Collection of key RE-AIM indicator data plotted along program timeline.

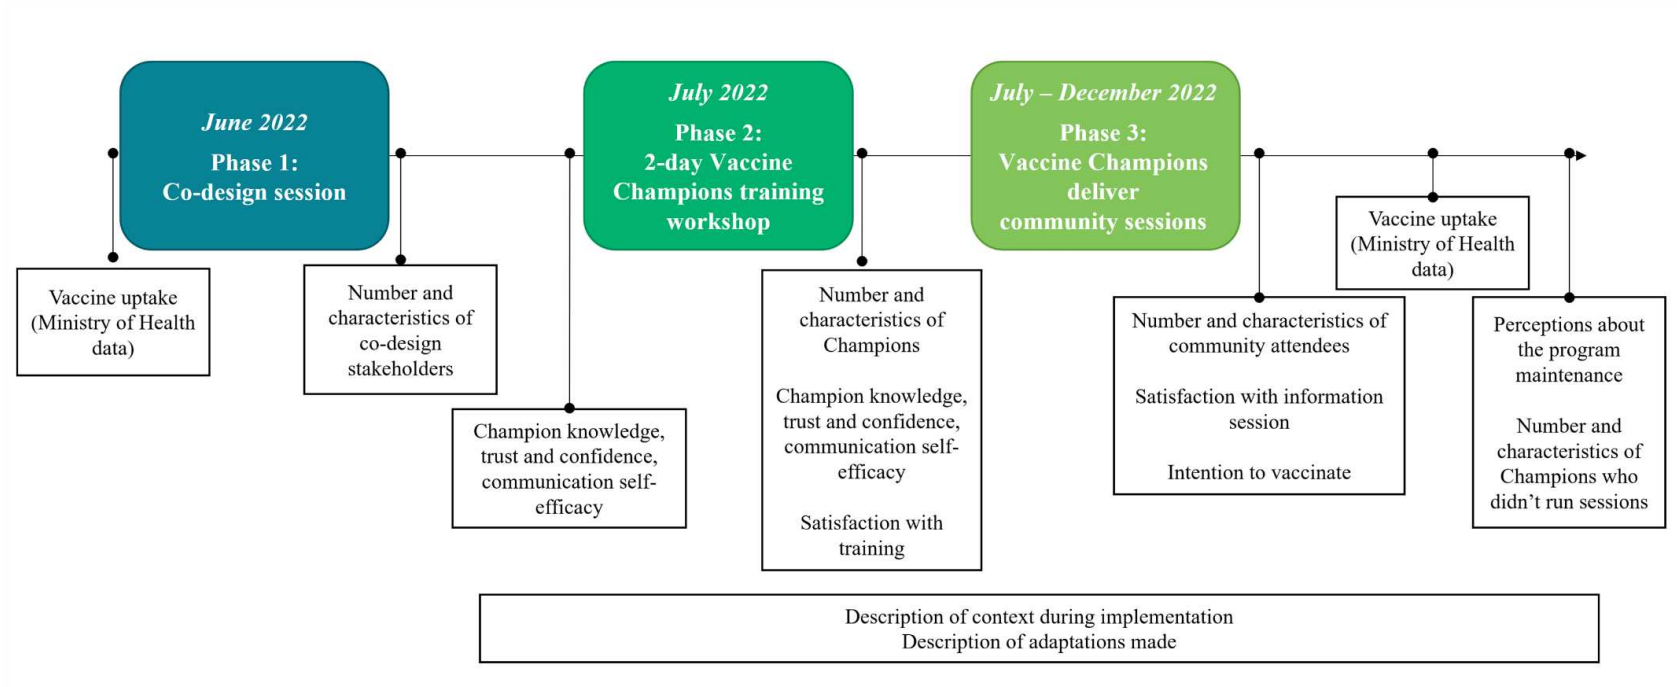

Supplemental Table 1. Vaccine Champions Survey

| # | Question                                                                                                                                                | Response options                                                                                                                                                                                                                                                                                                                                                                                                              | Question source and scoring                                                                                                                                                                                                                                | Timing and analysis                                        |
|---|---------------------------------------------------------------------------------------------------------------------------------------------------------|-------------------------------------------------------------------------------------------------------------------------------------------------------------------------------------------------------------------------------------------------------------------------------------------------------------------------------------------------------------------------------------------------------------------------------|------------------------------------------------------------------------------------------------------------------------------------------------------------------------------------------------------------------------------------------------------------|------------------------------------------------------------|
|   | <i>Knowledge</i>                                                                                                                                        |                                                                                                                                                                                                                                                                                                                                                                                                                               |                                                                                                                                                                                                                                                            |                                                            |
| 1 | What are the common side effects associated with COVID-19 vaccines Pfizer or Moderna? Tick all that apply                                               | <ul style="list-style-type: none"><li>• Sore arm (x)</li><li>• Headache (x)</li><li>• Sore throat</li><li>• Rash</li><li>• Mild fever (x)</li><li>• Persistent cough</li><li>• Fatigue (x)</li><li>• Diarrhea</li><li>• Body aches (x)</li><li>• Ear aches</li></ul>                                                                                                                                                          | <p>Developed by researchers</p> <p>Summary: scored as correct (all 5 correct responses identified) v. incorrect (more, different or fewer than 5 correct responses identified)</p> <p>Individual: correct identification of each of the 5 side effects</p> | Pre / post: percentage of participants answering correctly |
| 2 | What are the recommended strategies you can use when talking about COVID-19 vaccines with people who aren't sure about the vaccine? Tick all that apply | <ul style="list-style-type: none"><li>• Talk about relevant statistics</li><li>• Focus on vaccine side effects</li><li>• Talk about the risks of COVID-19 disease (x)</li><li>• Address every concern</li><li>• Continue the conversation</li><li>• Use persuasive communication techniques</li><li>• Share your experiences (x)</li><li>• Ask what concerns the person has (x)</li><li>• Recommend vaccination (x)</li></ul> | <p>Developed by researchers</p> <p>Summary: scored as correct (all 4 correct responses identified) v. incorrect (more, different or fewer than 4 correct responses identified)</p> <p>Individual: correct identification of each of the 4 strategies</p>   | Pre / post: percentage of participants answering correctly |
|   | Which of these are NOT diseases we vaccinate kids for? Tick all that apply                                                                              | <ul style="list-style-type: none"><li>• Measles</li><li>• Malaria (X)</li><li>• Rotavirus</li><li>• Human papilloma virus (HPV)</li><li>• Dengue (X)</li></ul>                                                                                                                                                                                                                                                                | <p>Developed by researchers</p> <p>Summary: scored as correct (all 2 correct responses identified) v. incorrect (more, different or fewer</p>                                                                                                              | Pre / post: percentage of participants answering correctly |

| # | Question                                                                                                                                                     | Response options                                                                                                            | Question source and scoring                                                                                                                                   | Timing and analysis                 |
|---|--------------------------------------------------------------------------------------------------------------------------------------------------------------|-----------------------------------------------------------------------------------------------------------------------------|---------------------------------------------------------------------------------------------------------------------------------------------------------------|-------------------------------------|
|   |                                                                                                                                                              |                                                                                                                             | than 2 correct responses identified)<br><br>Individual: correct identification of each of the 2 diseases                                                      |                                     |
|   | Communication self-efficacy                                                                                                                                  |                                                                                                                             |                                                                                                                                                               |                                     |
| 3 | How often do you currently talk to people about vaccination?                                                                                                 | Never<br>Rarely<br>Sometimes<br>Often                                                                                       | Developed by researchers<br><br>Detail to be explored further in interviews                                                                                   | Pre: establish baseline             |
| 4 | Have you ever received training to communicate about health issues?                                                                                          | Yes<br>No                                                                                                                   | Developed by researchers<br><br>Detail to be explored further in interviews                                                                                   | Pre: establish baseline             |
| 5 | Rate how confident you are that you can do each of the following activities <b>as of now</b> .<br><br>Right now, how confident are you in your ability to... | 0 (Cannot do at all) – 1 – 2 – 3 – 4 – 5<br>(Moderately certain I can do) – 6 – 7 – 8 – 9<br>- 10 (Highly certain I can do) | Questions adapted from Henrickson 2012, scale applied from Bandura 2006<br><br>Analysed as continuous variable; mean across all 6 items = self-efficacy score | Pre / post: change in self-efficacy |
| 6 | Talk about the side effects of vaccines                                                                                                                      | 0 – 10                                                                                                                      |                                                                                                                                                               |                                     |
| 7 | Talk about the benefits of vaccines                                                                                                                          | 0 – 10                                                                                                                      |                                                                                                                                                               |                                     |
| 8 | Help someone find information about vaccines                                                                                                                 | 0 – 10                                                                                                                      |                                                                                                                                                               |                                     |
| 9 | Answer difficult questions about vaccines                                                                                                                    | 0 - 10                                                                                                                      |                                                                                                                                                               |                                     |

| #  | Question                                                                                                                 | Response options                                                                     | Question source and scoring                                                             | Timing and analysis       |
|----|--------------------------------------------------------------------------------------------------------------------------|--------------------------------------------------------------------------------------|-----------------------------------------------------------------------------------------|---------------------------|
| 10 | Start a conversation about vaccines with a hesitant person                                                               | 0 - 10                                                                               |                                                                                         |                           |
| 11 | Address misinformation about vaccines                                                                                    | 0 - 10                                                                               |                                                                                         |                           |
|    | <b><i>Trust in medical system</i></b>                                                                                    |                                                                                      |                                                                                         |                           |
| 12 | How much do you trust the medical system that provides vaccines?                                                         | Not at all<br>A little<br>Moderately<br>Very much                                    | Question adapted from WHO BeSD                                                          | Pre/post: change in trust |
|    | <b><i>Confidence</i></b>                                                                                                 |                                                                                      |                                                                                         |                           |
| 13 | How much do you trust COVID-19 vaccines?                                                                                 | Not at all<br>A little<br>Moderately<br>Very much                                    | WHO BeSD COVID-19 survey item (trust)                                                   | Pre/post change           |
| 14 | How important do you think getting a COVID-19 vaccine is for your health?                                                | Not at all important<br>A little important<br>Moderately important<br>Very important | WHO BeSD COVID-19 survey item (confidence in benefits/ necessity)                       | Pre/post change           |
| 15 | How much do you think getting a COVID-19 vaccine for yourself will protect other people in your community from COVID-19? | Not at all<br>A little<br>Moderately<br>Very much                                    | WHO BeSD COVID-19 survey item (confidence in protecting others/ transmission reduction) | Pre/post change           |
| 16 | How safe do you think a COVID-19 vaccine is for you?                                                                     | Not at all safe<br>A little safe<br>Moderately safe<br>Very safe                     | WHO BeSD COVID-19 survey item (confidence in safety)                                    | Pre/post change           |
| 17 | How well do you think COVID-19 vaccines work to prevent COVID-19 disease?                                                | Not at all<br>A little<br>Moderately well                                            | Question from Gilkey Vaccine Confidence Scale, response options from WHO BeSD           | Pre/post change           |

| #  | Question                                                                | Response options                                                                                                                               | Question source and scoring   | Timing and analysis           |
|----|-------------------------------------------------------------------------|------------------------------------------------------------------------------------------------------------------------------------------------|-------------------------------|-------------------------------|
|    |                                                                         | Very well                                                                                                                                      | (confidence in effectiveness) |                               |
|    | <b>Perceived public support for vaccination</b>                         |                                                                                                                                                |                               |                               |
| 18 | Do you think most adults you know will get a COVID-19 vaccine booster?  | <div><div>- No</div><div>- Yes</div></div>                                                                                                     | WHO BeSD (social norms)       | Pre/post, percentage agreeing |
|    | <b>Intervention satisfaction</b>                                        |                                                                                                                                                |                               |                               |
|    | Please rate how satisfied you were with the following:                  | <div>1: Very satisfied</div> <div>2: Satisfied</div> <div>3: Neutral</div> <div>4: Not very satisfied</div> <div>5: Not satisfied at all</div> | Developed by research team    | Post measure only             |
| 19 | The Vaccine Champions training session                                  | <div>1 (very satisfied) to 5 (not satisfied at all)</div> <div>If 3-5, what do you think could be improved? _____</div>                        |                               |                               |
| 20 | The materials provided to you for running your own information sessions | <div>1 (very satisfied) to 5 (not satisfied at all)</div> <div>If 3-5, what do you think could be improved? _____</div>                        |                               |                               |
| 21 | The support sessions you had with the study team                        | <div>1 (very satisfied) to 5 (not satisfied at all)</div> <div>If 3-5, what do you think could be improved? _____</div>                        |                               |                               |
| 22 | The financial compensation you received for participating in the study  | <div>1 (very satisfied) to 5 (not satisfied at all)</div> <div>If 3-5, what do you think could be improved? _____</div>                        |                               |                               |
|    | <b>Perceived sustainability</b>                                         |                                                                                                                                                |                               |                               |

| #   | Question                                                                           | Response options                                                                           | Question source and scoring                                                                    | Timing and analysis |
|-----|------------------------------------------------------------------------------------|--------------------------------------------------------------------------------------------|------------------------------------------------------------------------------------------------|---------------------|
|     | How easy do you think it will be to sustain the following intervention activities? | 1: very easy<br>2: easy<br>3: challenging<br>4: very challenging to sustain                | Perialathan 2021<br><br>Dichotomised as perceived easy v. perceived challenging                | Post measure only   |
| 23  | Holding formal community information sessions                                      | 1 (very easy) to 4 (very challenging)                                                      |                                                                                                |                     |
| 24  | Providing information COVID-19 vaccine recommendations                             | 1 (very easy) to 4 (very challenging)                                                      |                                                                                                |                     |
| 25  | Talking to friends and family about vaccines                                       | 1 (very easy) to 4 (very challenging)                                                      |                                                                                                |                     |
| 26  | Communicating regularly with MoH representatives about vaccine issues              | 1 (very easy) to 4 (very challenging)                                                      |                                                                                                |                     |
|     | <b>Demographics</b>                                                                |                                                                                            |                                                                                                |                     |
| 27  | How many doses of COVID-19 vaccine have you had?                                   | 0<br>1<br>2<br>3<br>More than 3                                                            | Research team developed                                                                        | Pre/post            |
| 27b | [If Q27 = 0 or 1]: Do you want to get a COVID-19 vaccine?                          | No<br>Yes<br>Not sure                                                                      | WHO BeSD (intention to get vaccinated)                                                         | Pre/post            |
| 28  | What is your highest level of education?                                           | - Primary school<br>- Secondary school<br>- Certificate<br>- University<br>- Post-graduate | (Appropriate response options to be determined following consultation with local stakeholders) | Pre                 |

| #   | Question                                                                                         | Response options                                                                                                                                                                                                                                                                        | Question source and scoring                                                                    | Timing and analysis |
|-----|--------------------------------------------------------------------------------------------------|-----------------------------------------------------------------------------------------------------------------------------------------------------------------------------------------------------------------------------------------------------------------------------------------|------------------------------------------------------------------------------------------------|---------------------|
| 29  | What is your professional role?                                                                  | <ul style="list-style-type: none"><li>- Media</li><li>- Doctor</li><li>- Nurse</li><li>- Community health worker</li><li>- Business person</li><li>- Teacher</li><li>- Tradesperson</li><li>- NGO worker</li><li>- Volunteer</li><li>- Sports</li><li>- Faith</li><li>- Other</li></ul> | (Appropriate response options to be determined following consultation with local stakeholders) | Pre                 |
| 29b | [If Q29 = doctor or nurse or community health worker]: How many years have you worked in health? | ____                                                                                                                                                                                                                                                                                    | Numerical response                                                                             | Pre                 |
| 30  | What is your gender?                                                                             | <ul style="list-style-type: none"><li>- Male</li><li>- Female</li><li>- Other or prefer not to say</li></ul>                                                                                                                                                                            |                                                                                                | Pre                 |
| 31  | What language do you speak at home?                                                              | ____                                                                                                                                                                                                                                                                                    | (Appropriate response options to be determined following consultation with local stakeholders) | Pre                 |
